# Supplementary material
Source: publisher figshare collection journal article supplement (https://acs.figshare.com/ndownloader/files/5094997)
Supplement: Supplementary file 1 [file 5094997]

#  CIF produced by WinGX routine CIF_UPDATE
#  Created on 2005-02-21 at 18:40:19
#  Using CIFtbx version 2.6.2 16 Jun 1998
 
#  Dictionary name : cif_core.dic
#  Dictionary vers : 2.2
#  Request file    : c:\wingx\files\archive.dat
#  CIF files read  : mr05mqn struct
 
 
data_mr05mqn
 
_audit_creation_date            2005-02-21T18:40:19-00:00
_audit_creation_method         'WinGX routine CIF_UPDATE'
_audit_conform_dict_name        cif_core.dic
_audit_conform_dict_version     2.2
_audit_conform_dict_location    ftp://ftp.iucr.org/pub/cif_core.dic
_publ_requested_category        FM
 
#----------------------------------------------------------------------------#
#                   CHEMICAL INFORMATION                                     #
#----------------------------------------------------------------------------#
 
_chemical_name_systematic
;
 ?
;
_chemical_formula_moiety                'C32 H41 Cl2 Mo1 O5 P1'
_chemical_formula_sum                   'C32 H41 Cl2 Mo O5 P'
_chemical_formula_weight                703.46
_chemical_compound_source               'synthesis as described'
 
#----------------------------------------------------------------------------#
#                   UNIT CELL INFORMATION                                    #
#----------------------------------------------------------------------------#
 
_symmetry_cell_setting                  monoclinic
_symmetry_space_group_name_H-M          'P 21/c'
_symmetry_space_group_name_Hall         '-P 2ybc'
_symmetry_Int_Tables_number             14
loop_
    _symmetry_equiv_pos_as_xyz
'x, y, z'
'-x, y+1/2, -z+1/2'
'-x, -y, -z'
'x, -y-1/2, z-1/2'
 
_cell_length_a                          15.229(2)
_cell_length_b                          10.9352(17)
_cell_length_c                          20.058(3)
_cell_angle_alpha                       90
_cell_angle_beta                        103.385(3)
_cell_angle_gamma                       90
_cell_volume                            3249.6(8)
_cell_formula_units_Z                   4
_cell_measurement_temperature           120(2)
_cell_measurement_reflns_used  	        965
_cell_measurement_theta_min             2.40
_cell_measurement_theta_max             23.66
_cell_measurement_wavelength            0.71073
 
#----------------------------------------------------------------------------#
#                   CRYSTAL INFORMATION                                      #
#----------------------------------------------------------------------------#
 
_exptl_crystal_description              prism
_exptl_crystal_colour                   orange
_exptl_crystal_size_max                 0.25
_exptl_crystal_size_mid                 0.11
_exptl_crystal_size_min                 0.07
_exptl_crystal_density_diffrn           1.438
_exptl_crystal_density_method           'not measured'
_exptl_crystal_F_000                    1456
_exptl_special_details
;
 ?
;
 
#----------------------------------------------------------------------------#
#                   ABSORPTION CORRECTION                                    #
#----------------------------------------------------------------------------#
 
_exptl_absorpt_coefficient_mu           0.655
_exptl_absorpt_correction_type          multi-scan
_exptl_absorpt_process_details		'BRUKER Sadabs'
_exptl_absorpt_correction_T_min         0.8534
_exptl_absorpt_correction_T_max         0.9556
 
#----------------------------------------------------------------------------#
#                   DATA COLLECTION                                          #
#----------------------------------------------------------------------------#
 
_diffrn_ambient_temperature             120(2)
_diffrn_radiation_wavelength            0.71073
_diffrn_radiation_source                'fine-focus sealed tube'
_diffrn_radiation_type                  MoK\a
_diffrn_radiation_monochromator         graphite
_diffrn_measurement_device_type         'Smart-CCD-1000 BRUKER'
_diffrn_measurement_method              'omega scans'
_diffrn_radiation_probe                 x-ray
_diffrn_reflns_av_R_equivalents         0.047
_diffrn_reflns_av_unetI/netI            0.0406
_diffrn_reflns_number                   23665
_diffrn_reflns_limit_h_min              -17
_diffrn_reflns_limit_h_max              17
_diffrn_reflns_limit_k_min              -12
_diffrn_reflns_limit_k_max              12
_diffrn_reflns_limit_l_min              -23
_diffrn_reflns_limit_l_max              23
_diffrn_reflns_theta_min                1.37
_diffrn_reflns_theta_max                24.77
_diffrn_reflns_theta_full               24.77
_diffrn_measured_fraction_theta_full
                                        0.997
_diffrn_measured_fraction_theta_max
                                        0.997
_reflns_number_total                    5548
_reflns_number_gt                       4216
_reflns_threshold_expression            >2sigma(I)
 
#----------------------------------------------------------------------------#
#                   COMPUTER PROGRAMS USED                                   #
#----------------------------------------------------------------------------#
 
_computing_data_collection              'Brucker Smart'
_computing_cell_refinement              'Brucker Smart'
_computing_data_reduction               'Brucker Smart'
_computing_structure_solution           'DIRDIF (1999)'
_computing_structure_refinement         'SHELXL-97 (Sheldrick, 1997)'
_computing_molecular_graphics           'Ortep-3 for Windows (Farrugia, 1997)'
_computing_publication_material
                                   'WinGX publication routines (Farrugia, 1999)'
 
#----------------------------------------------------------------------------#
#                   REFINEMENT INFORMATION                                   #
#----------------------------------------------------------------------------#
 
_refine_special_details
;
 Refinement of F^2^ against ALL reflections.  The weighted R-factor wR and
 goodness of fit S are based on F^2^, conventional R-factors R are based
 on F, with F set to zero for negative F^2^. The threshold expression of
 F^2^ > 2sigma(F^2^) is used only for calculating R-factors(gt) etc. and is
 not relevant to the choice of reflections for refinement.  R-factors based
 on F^2^ are statistically about twice as large as those based on F, and R-
 factors based on ALL data will be even larger.
;
_refine_ls_structure_factor_coef        Fsqd
_refine_ls_matrix_type                  full
_refine_ls_weighting_scheme             calc
_refine_ls_weighting_details
        'calc w=1/[\s^2^(Fo^2^)+(0.0277P)^2^+11.5110P] where P=(Fo^2^+2Fc^2^)/3'
_atom_sites_solution_primary            direct
_atom_sites_solution_secondary          difmap
_atom_sites_solution_hydrogens          geom
_refine_ls_hydrogen_treatment           mixed
_refine_ls_extinction_method            none
_refine_ls_number_reflns                5548
_refine_ls_number_parameters            530
_refine_ls_number_restraints            0
_refine_ls_R_factor_all                 0.0605
_refine_ls_R_factor_gt                  0.0386
_refine_ls_wR_factor_ref                0.1002
_refine_ls_wR_factor_gt                 0.0832
_refine_ls_goodness_of_fit_ref          1.041
_refine_ls_restrained_S_all             1.041
_refine_ls_shift/su_max                 0
_refine_ls_shift/su_mean                0
_refine_diff_density_max                1.697
_refine_diff_density_min                -0.563
_refine_diff_density_rms                0.091
 
#----------------------------------------------------------------------------#
#                   ATOMIC TYPES, COORDINATES AND THERMAL PARAMETERS         #
#----------------------------------------------------------------------------#
 
loop_
    _atom_type_symbol
    _atom_type_description
    _atom_type_scat_dispersion_real
    _atom_type_scat_dispersion_imag
    _atom_type_scat_source
C C 0.0033 0.0016 'International Tables Vol C Tables 4.2.6.8 and 6.1.1.4'
H H 0 0 'International Tables Vol C Tables 4.2.6.8 and 6.1.1.4'
Mo Mo -1.6832 0.6857 'International Tables Vol C Tables 4.2.6.8 and 6.1.1.4'
O O 0.0106 0.006 'International Tables Vol C Tables 4.2.6.8 and 6.1.1.4'
P P 0.1023 0.0942 'International Tables Vol C Tables 4.2.6.8 and 6.1.1.4'
Cl Cl 0.1484 0.1585 'International Tables Vol C Tables 4.2.6.8 and 6.1.1.4'
 
loop_
    _atom_site_label
    _atom_site_type_symbol
    _atom_site_fract_x
    _atom_site_fract_y
    _atom_site_fract_z
    _atom_site_U_iso_or_equiv
    _atom_site_adp_type
    _atom_site_occupancy
    _atom_site_symmetry_multiplicity
    _atom_site_calc_flag
    _atom_site_refinement_flags
    _atom_site_disorder_assembly
    _atom_site_disorder_group
Mo1 Mo 0.25526(2) 0.13752(3) 0.294027(18) 0.01985(11) Uani 1 1 d . . .
P1 P 0.20826(7) 0.09057(9) 0.17661(5) 0.0171(2) Uani 1 1 d . . .
O1 O 0.1651(2) -0.0584(3) 0.36921(18) 0.0484(10) Uani 1 1 d . . .
O2 O 0.3887(2) -0.0822(3) 0.32016(18) 0.0402(8) Uani 1 1 d . . .
O3 O 0.13135(17) 0.1405(2) 0.20780(13) 0.0194(6) Uani 1 1 d . . .
O4 O 0.17743(17) -0.0369(2) 0.13846(13) 0.0189(6) Uani 1 1 d . . .
O6 O 0.04345(19) -0.4188(3) 0.26692(15) 0.0306(7) Uani 1 1 d . . .
H1 H -0.0108 -0.4108 0.2644 0.046 Uiso 1 1 calc R . .
C1 C 0.1946(3) 0.0148(4) 0.3392(2) 0.0280(10) Uani 1 1 d . . .
C2 C 0.3393(3) -0.0008(4) 0.3098(2) 0.0277(10) Uani 1 1 d . . .
C3 C 0.3098(3) 0.3359(4) 0.2805(3) 0.0317(11) Uani 1 1 d . . .
C4 C 0.3729(3) 0.2719(4) 0.3309(3) 0.0394(13) Uani 1 1 d . . .
C5 C 0.3328(4) 0.2481(5) 0.3860(3) 0.0463(14) Uani 1 1 d . . .
C6 C 0.2454(4) 0.2970(5) 0.3691(3) 0.0438(14) Uani 1 1 d . . .
C7 C 0.2329(3) 0.3506(4) 0.3055(3) 0.0350(12) Uani 1 1 d . . .
C8 C 0.1430(3) -0.1325(3) 0.17234(19) 0.0176(8) Uani 1 1 d . . .
C9 C 0.0520(3) -0.1357(4) 0.1711(2) 0.0209(9) Uani 1 1 d . . .
C10 C 0.0181(3) -0.2305(4) 0.2028(2) 0.0232(9) Uani 1 1 d . . .
C11 C 0.0738(3) -0.3230(4) 0.2340(2) 0.0237(9) Uani 1 1 d . . .
C12 C 0.1645(3) -0.3205(4) 0.2328(2) 0.0287(10) Uani 1 1 d . . .
C13 C 0.1995(3) -0.2241(4) 0.2025(2) 0.0259(10) Uani 1 1 d . . .
C14 C 0.2364(3) 0.1919(4) 0.11250(19) 0.0174(8) Uani 1 1 d . . .
C15 C 0.1737(2) 0.2843(3) 0.08242(19) 0.0165(8) Uani 1 1 d . . .
C16 C 0.2084(3) 0.3979(4) 0.0697(2) 0.0182(9) Uani 1 1 d . . .
C17 C 0.2991(3) 0.4226(3) 0.07989(19) 0.0174(8) Uani 1 1 d . . .
C18 C 0.3573(3) 0.3234(4) 0.0975(2) 0.0175(9) Uani 1 1 d . . .
C19 C 0.3297(3) 0.2086(3) 0.11317(19) 0.0169(8) Uani 1 1 d . . .
C20 C 0.4049(3) 0.1091(4) 0.1259(2) 0.0216(9) Uani 1 1 d . . .
C21 C 0.4434(3) 0.1051(4) 0.0610(2) 0.0267(10) Uani 1 1 d . . .
C22 C 0.4805(3) 0.1436(5) 0.1877(2) 0.0283(10) Uani 1 1 d . . .
C23 C 0.3745(3) -0.0213(4) 0.1361(3) 0.0256(10) Uani 1 1 d . . .
C24 C 0.0694(3) 0.2730(4) 0.0590(2) 0.0220(9) Uani 1 1 d . . .
C25 C 0.0336(3) 0.1426(5) 0.0571(3) 0.0290(10) Uani 1 1 d . . .
C26 C 0.0240(3) 0.3520(5) 0.1042(3) 0.0306(10) Uani 1 1 d . . .
C27 C 0.0415(3) 0.3202(5) -0.0155(3) 0.0321(11) Uani 1 1 d . . .
C28 C 0.3351(3) 0.5517(4) 0.0725(2) 0.0228(9) Uani 1 1 d . . .
C29 C 0.3886(3) 0.5921(5) 0.1435(3) 0.0321(11) Uani 1 1 d . . .
C30 C 0.2599(3) 0.6445(4) 0.0474(2) 0.0271(10) Uani 1 1 d . . .
C31 C 0.3970(4) 0.5508(5) 0.0224(3) 0.0407(13) Uani 1 1 d . . .
C50 C 0.7942(3) 0.1285(5) 0.0930(3) 0.0356(11) Uani 1 1 d . . .
Cl1 Cl 0.68146(8) 0.14418(14) 0.10017(7) 0.0514(4) Uani 1 1 d . . .
Cl2 Cl 0.80163(8) 0.02810(12) 0.02612(7) 0.0436(3) Uani 1 1 d . . .
H3 H 0.322(3) 0.359(5) 0.243(3) 0.041(15) Uiso 1 1 d . . .
H4 H 0.430(4) 0.255(5) 0.326(3) 0.065(18) Uiso 1 1 d . . .
H5 H 0.361(4) 0.215(5) 0.425(3) 0.053(17) Uiso 1 1 d . . .
H6 H 0.206(4) 0.298(5) 0.393(3) 0.046(16) Uiso 1 1 d . . .
H7 H 0.187(3) 0.381(5) 0.285(3) 0.041(16) Uiso 1 1 d . . .
H9 H 0.020(3) -0.081(4) 0.153(2) 0.021(12) Uiso 1 1 d . . .
H10 H -0.039(3) -0.235(3) 0.2024(18) 0.008(9) Uiso 1 1 d . . .
H12 H 0.202(3) -0.379(4) 0.2539(19) 0.011(10) Uiso 1 1 d . . .
H13 H 0.264(3) -0.219(4) 0.204(2) 0.022(11) Uiso 1 1 d . . .
H16 H 0.172(3) 0.452(4) 0.053(2) 0.014(11) Uiso 1 1 d . . .
H18 H 0.411(3) 0.332(3) 0.0968(18) 0.005(9) Uiso 1 1 d . . .
H21A H 0.398(3) 0.083(4) 0.020(2) 0.025(11) Uiso 1 1 d . . .
H21B H 0.473(3) 0.184(4) 0.054(2) 0.026(11) Uiso 1 1 d . . .
H21C H 0.489(3) 0.040(4) 0.066(2) 0.037(13) Uiso 1 1 d . . .
H22A H 0.502(3) 0.225(4) 0.183(2) 0.028(12) Uiso 1 1 d . . .
H22B H 0.526(3) 0.090(4) 0.192(2) 0.022(11) Uiso 1 1 d . . .
H22C H 0.459(3) 0.141(5) 0.227(3) 0.046(15) Uiso 1 1 d . . .
H23A H 0.425(3) -0.074(4) 0.137(2) 0.024(11) Uiso 1 1 d . . .
H23B H 0.331(3) -0.052(4) 0.098(2) 0.021(11) Uiso 1 1 d . . .
H23C H 0.362(3) -0.029(5) 0.182(3) 0.047(15) Uiso 1 1 d . . .
H25A H -0.020(3) 0.145(4) 0.035(2) 0.017(11) Uiso 1 1 d . . .
H25B H 0.064(3) 0.092(5) 0.034(3) 0.043(15) Uiso 1 1 d . . .
H25C H 0.032(3) 0.111(4) 0.101(3) 0.042(14) Uiso 1 1 d . . .
H26A H 0.043(3) 0.434(4) 0.105(2) 0.025(12) Uiso 1 1 d . . .
H26B H 0.036(3) 0.323(4) 0.148(2) 0.025(12) Uiso 1 1 d . . .
H26C H -0.041(4) 0.351(4) 0.086(2) 0.044(14) Uiso 1 1 d . . .
H27A H 0.056(3) 0.399(5) -0.020(2) 0.028(12) Uiso 1 1 d . . .
H27B H 0.068(3) 0.274(4) -0.044(2) 0.020(11) Uiso 1 1 d . . .
H27C H -0.026(4) 0.312(5) -0.035(3) 0.061(17) Uiso 1 1 d . . .
H29A H 0.352(3) 0.592(4) 0.180(2) 0.026(12) Uiso 1 1 d . . .
H29B H 0.436(3) 0.544(4) 0.159(2) 0.032(13) Uiso 1 1 d . . .
H29C H 0.413(3) 0.678(5) 0.142(2) 0.034(13) Uiso 1 1 d . . .
H30A H 0.222(3) 0.656(4) 0.077(2) 0.017(11) Uiso 1 1 d . . .
H30B H 0.289(3) 0.724(4) 0.0452(19) 0.018(10) Uiso 1 1 d . . .
H30C H 0.228(3) 0.622(4) 0.006(3) 0.040(14) Uiso 1 1 d . . .
H31A H 0.366(3) 0.531(4) -0.020(2) 0.020(12) Uiso 1 1 d . . .
H31B H 0.448(3) 0.498(4) 0.038(2) 0.029(12) Uiso 1 1 d . . .
H31C H 0.423(4) 0.630(5) 0.019(3) 0.056(16) Uiso 1 1 d . . .
H50A H 0.816(4) 0.220(5) 0.087(3) 0.063(17) Uiso 1 1 d . . .
H50B H 0.831(3) 0.094(4) 0.136(3) 0.041(14) Uiso 1 1 d . . .
 
loop_
    _atom_site_aniso_label
    _atom_site_aniso_U_11
    _atom_site_aniso_U_22
    _atom_site_aniso_U_33
    _atom_site_aniso_U_23
    _atom_site_aniso_U_13
    _atom_site_aniso_U_12
Mo1 0.02145(19) 0.01833(19) 0.02065(19) -0.00001(15) 0.00668(14) -0.00220(15)
P1 0.0159(5) 0.0138(5) 0.0222(5) 0.0003(4) 0.0059(4) -0.0003(4)
O1 0.039(2) 0.059(2) 0.050(2) 0.0229(19) 0.0157(17) -0.0109(18)
O2 0.0310(18) 0.0317(19) 0.057(2) 0.0098(17) 0.0079(16) 0.0090(16)
O3 0.0199(14) 0.0176(14) 0.0225(14) -0.0009(12) 0.0086(11) 0.0003(12)
O4 0.0203(14) 0.0154(14) 0.0234(15) -0.0008(11) 0.0100(12) -0.0020(11)
O6 0.0242(16) 0.0283(17) 0.0432(19) 0.0094(14) 0.0157(14) -0.0029(13)
C1 0.022(2) 0.037(3) 0.025(2) 0.004(2) 0.0042(19) -0.001(2)
C2 0.023(2) 0.029(3) 0.032(2) 0.002(2) 0.0076(19) -0.006(2)
C3 0.044(3) 0.019(2) 0.035(3) -0.008(2) 0.017(2) -0.014(2)
C4 0.025(3) 0.027(3) 0.065(4) -0.018(2) 0.009(3) -0.009(2)
C5 0.067(4) 0.031(3) 0.030(3) -0.007(2) -0.010(3) -0.013(3)
C6 0.058(4) 0.033(3) 0.051(3) -0.017(3) 0.033(3) -0.012(3)
C7 0.030(3) 0.016(2) 0.056(3) -0.009(2) 0.005(2) -0.001(2)
C8 0.022(2) 0.0127(19) 0.020(2) -0.0018(17) 0.0090(16) -0.0045(17)
C9 0.019(2) 0.018(2) 0.025(2) -0.0002(19) 0.0049(17) 0.0021(19)
C10 0.015(2) 0.027(2) 0.031(2) -0.0031(19) 0.0103(18) -0.0047(18)
C11 0.028(2) 0.017(2) 0.030(2) -0.0021(17) 0.0142(19) -0.0058(18)
C12 0.023(2) 0.022(2) 0.044(3) 0.009(2) 0.013(2) 0.005(2)
C13 0.019(2) 0.023(2) 0.040(3) 0.0005(19) 0.015(2) -0.0004(18)
C14 0.017(2) 0.022(2) 0.0131(19) -0.0034(16) 0.0018(16) -0.0031(17)
C15 0.015(2) 0.021(2) 0.014(2) -0.0017(16) 0.0049(15) 0.0024(16)
C16 0.019(2) 0.017(2) 0.017(2) 0.0037(16) 0.0021(17) 0.0036(17)
C17 0.020(2) 0.018(2) 0.015(2) 0.0005(16) 0.0057(16) -0.0037(17)
C18 0.012(2) 0.022(2) 0.019(2) 0.0009(16) 0.0050(16) 0.0001(17)
C19 0.018(2) 0.018(2) 0.015(2) 0.0020(16) 0.0061(16) 0.0017(16)
C20 0.019(2) 0.022(2) 0.025(2) 0.0035(17) 0.0054(17) 0.0026(17)
C21 0.023(2) 0.028(3) 0.034(3) 0.001(2) 0.015(2) 0.005(2)
C22 0.021(2) 0.027(3) 0.034(3) 0.006(2) 0.003(2) 0.003(2)
C23 0.020(2) 0.021(2) 0.037(3) 0.001(2) 0.010(2) 0.0048(19)
C24 0.015(2) 0.021(2) 0.028(2) 0.0044(18) 0.0017(17) -0.0007(17)
C25 0.011(2) 0.031(3) 0.042(3) 0.000(2) -0.001(2) -0.001(2)
C26 0.023(3) 0.030(3) 0.042(3) 0.008(2) 0.014(2) 0.008(2)
C27 0.023(3) 0.037(3) 0.034(3) 0.005(2) 0.001(2) -0.004(2)
C28 0.025(2) 0.020(2) 0.025(2) 0.0007(17) 0.0100(18) -0.0050(17)
C29 0.028(3) 0.020(2) 0.043(3) -0.004(2) -0.003(2) -0.001(2)
C30 0.033(3) 0.019(2) 0.028(3) 0.004(2) 0.004(2) -0.003(2)
C31 0.047(3) 0.029(3) 0.056(4) 0.008(3) 0.031(3) -0.005(3)
C50 0.025(2) 0.041(3) 0.039(3) -0.001(2) 0.004(2) 0.001(2)
Cl1 0.0306(7) 0.0670(9) 0.0593(8) 0.0038(7) 0.0161(6) 0.0094(6)
Cl2 0.0369(7) 0.0535(8) 0.0428(7) -0.0061(6) 0.0139(6) -0.0078(6)
 
 
#----------------------------------------------------------------------------#
#                   MOLECULAR GEOMETRY                                       #
#----------------------------------------------------------------------------#
 
_geom_special_details
;
 All esds (except the esd in the dihedral angle between two l.s. planes)
 are estimated using the full covariance matrix.  The cell esds are taken
 into account individually in the estimation of esds in distances, angles
 and torsion angles; correlations between esds in cell parameters are only
 used when they are defined by crystal symmetry.  An approximate (isotropic)
 treatment of cell esds is used for estimating esds involving l.s. planes.
;
loop_
    _geom_bond_atom_site_label_1
    _geom_bond_atom_site_label_2
    _geom_bond_distance
    _geom_bond_site_symmetry_2
    _geom_bond_publ_flag
Mo1 C2 1.959(5) . ?
Mo1 C1 1.965(4) . ?
Mo1 O3 2.245(3) . ?
Mo1 C5 2.291(5) . ?
Mo1 C4 2.303(5) . ?
Mo1 C6 2.331(5) . ?
Mo1 P1 2.3541(11) . ?
Mo1 C3 2.361(4) . ?
Mo1 C7 2.374(5) . ?
P1 O3 1.549(3) . ?
P1 O4 1.607(3) . ?
P1 C14 1.822(4) . ?
O1 C1 1.153(5) . ?
O2 C2 1.153(5) . ?
O4 C8 1.412(4) . ?
O6 C11 1.374(5) . ?
O6 H1 0.82 . ?
C3 C7 1.385(7) . ?
C3 C4 1.410(7) . ?
C3 H3 0.85(5) . ?
C4 C5 1.405(8) . ?
C4 H4 0.91(6) . ?
C5 C6 1.401(8) . ?
C5 H5 0.89(5) . ?
C6 C7 1.377(8) . ?
C6 H6 0.85(5) . ?
C7 H7 0.80(5) . ?
C8 C13 1.367(6) . ?
C8 C9 1.380(5) . ?
C9 C10 1.378(6) . ?
C9 H9 0.81(4) . ?
C10 C11 1.374(6) . ?
C10 H10 0.86(4) . ?
C11 C12 1.388(6) . ?
C12 C13 1.384(6) . ?
C12 H12 0.90(4) . ?
C13 H13 0.97(4) . ?
C14 C15 1.425(5) . ?
C14 C19 1.430(5) . ?
C15 C16 1.395(5) . ?
C15 C24 1.554(5) . ?
C16 C17 1.376(5) . ?
C16 H16 0.83(4) . ?
C17 C18 1.394(6) . ?
C17 C28 1.535(5) . ?
C18 C19 1.383(5) . ?
C18 H18 0.83(4) . ?
C19 C20 1.557(5) . ?
C20 C23 1.527(6) . ?
C20 C22 1.531(6) . ?
C20 C21 1.549(6) . ?
C21 H21A 0.97(5) . ?
C21 H21B 0.99(4) . ?
C21 H21C 0.99(5) . ?
C22 H22A 0.97(5) . ?
C22 H22B 0.90(4) . ?
C22 H22C 0.92(5) . ?
C23 H23A 0.95(4) . ?
C23 H23B 0.96(4) . ?
C23 H23C 0.99(5) . ?
C24 C25 1.524(6) . ?
C24 C26 1.528(6) . ?
C24 C27 1.544(6) . ?
C25 H25A 0.84(4) . ?
C25 H25B 0.91(5) . ?
C25 H25C 0.96(5) . ?
C26 H26A 0.94(5) . ?
C26 H26B 0.90(5) . ?
C26 H26C 0.97(5) . ?
C27 H27A 0.90(5) . ?
C27 H27B 0.92(4) . ?
C27 H27C 1.02(6) . ?
C28 C30 1.526(6) . ?
C28 C31 1.528(6) . ?
C28 C29 1.533(6) . ?
C29 H29A 1.01(4) . ?
C29 H29B 0.90(5) . ?
C29 H29C 1.01(5) . ?
C30 H30A 0.93(4) . ?
C30 H30B 0.99(4) . ?
C30 H30C 0.90(5) . ?
C31 H31A 0.89(4) . ?
C31 H31B 0.96(5) . ?
C31 H31C 0.96(6) . ?
C50 Cl2 1.757(5) . ?
C50 Cl1 1.764(5) . ?
C50 H50A 1.07(6) . ?
C50 H50B 0.98(5) . ?
 
loop_
    _geom_angle_atom_site_label_1
    _geom_angle_atom_site_label_2
    _geom_angle_atom_site_label_3
    _geom_angle
    _geom_angle_site_symmetry_1
    _geom_angle_site_symmetry_3
    _geom_angle_publ_flag
C2 Mo1 C1 75.97(17) . . ?
C2 Mo1 O3 122.46(14) . . ?
C1 Mo1 O3 87.94(14) . . ?
C2 Mo1 C5 94.7(2) . . ?
C1 Mo1 C5 101.47(19) . . ?
O3 Mo1 C5 142.85(17) . . ?
C2 Mo1 C4 90.57(18) . . ?
C1 Mo1 C4 134.54(19) . . ?
O3 Mo1 C4 133.70(16) . . ?
C5 Mo1 C4 35.6(2) . . ?
C2 Mo1 C6 127.6(2) . . ?
C1 Mo1 C6 96.07(19) . . ?
O3 Mo1 C6 108.57(17) . . ?
C5 Mo1 C6 35.3(2) . . ?
C4 Mo1 C6 58.46(19) . . ?
C2 Mo1 P1 91.67(13) . . ?
C1 Mo1 P1 104.22(13) . . ?
O3 Mo1 P1 39.28(7) . . ?
C5 Mo1 P1 154.31(15) . . ?
C4 Mo1 P1 119.63(15) . . ?
C6 Mo1 P1 139.39(16) . . ?
C2 Mo1 C3 119.60(17) . . ?
C1 Mo1 C3 153.62(17) . . ?
O3 Mo1 C3 98.82(14) . . ?
C5 Mo1 C3 58.56(19) . . ?
C4 Mo1 C3 35.16(18) . . ?
C6 Mo1 C3 57.59(18) . . ?
P1 Mo1 C3 96.83(13) . . ?
C2 Mo1 C7 147.69(18) . . ?
C1 Mo1 C7 122.18(18) . . ?
O3 Mo1 C7 86.94(15) . . ?
C5 Mo1 C7 57.5(2) . . ?
C4 Mo1 C7 57.38(18) . . ?
C6 Mo1 C7 34.02(19) . . ?
P1 Mo1 C7 107.08(14) . . ?
C3 Mo1 C7 34.03(17) . . ?
O3 P1 O4 109.45(14) . . ?
O3 P1 C14 113.21(17) . . ?
O4 P1 C14 106.37(16) . . ?
O3 P1 Mo1 66.58(10) . . ?
O4 P1 Mo1 130.78(11) . . ?
C14 P1 Mo1 120.45(13) . . ?
P1 O3 Mo1 74.15(11) . . ?
C8 O4 P1 120.9(2) . . ?
C11 O6 H1 109.5 . . ?
O1 C1 Mo1 174.8(4) . . ?
O2 C2 Mo1 178.9(4) . . ?
C7 C3 C4 106.9(5) . . ?
C7 C3 Mo1 73.5(3) . . ?
C4 C3 Mo1 70.2(3) . . ?
C7 C3 H3 131(3) . . ?
C4 C3 H3 122(3) . . ?
Mo1 C3 H3 122(3) . . ?
C5 C4 C3 107.9(5) . . ?
C5 C4 Mo1 71.7(3) . . ?
C3 C4 Mo1 74.7(3) . . ?
C5 C4 H4 130(4) . . ?
C3 C4 H4 122(4) . . ?
Mo1 C4 H4 122(4) . . ?
C6 C5 C4 107.5(5) . . ?
C6 C5 Mo1 73.9(3) . . ?
C4 C5 Mo1 72.6(3) . . ?
C6 C5 H5 128(4) . . ?
C4 C5 H5 124(4) . . ?
Mo1 C5 H5 124(4) . . ?
C7 C6 C5 107.9(5) . . ?
C7 C6 Mo1 74.7(3) . . ?
C5 C6 Mo1 70.8(3) . . ?
C7 C6 H6 124(4) . . ?
C5 C6 H6 128(4) . . ?
Mo1 C6 H6 122(4) . . ?
C6 C7 C3 109.8(5) . . ?
C6 C7 Mo1 71.3(3) . . ?
C3 C7 Mo1 72.5(3) . . ?
C6 C7 H7 125(4) . . ?
C3 C7 H7 125(4) . . ?
Mo1 C7 H7 119(4) . . ?
C13 C8 C9 121.1(4) . . ?
C13 C8 O4 119.3(3) . . ?
C9 C8 O4 119.5(4) . . ?
C10 C9 C8 119.5(4) . . ?
C10 C9 H9 121(3) . . ?
C8 C9 H9 120(3) . . ?
C11 C10 C9 120.4(4) . . ?
C11 C10 H10 118(2) . . ?
C9 C10 H10 121(2) . . ?
O6 C11 C10 122.7(4) . . ?
O6 C11 C12 118.1(4) . . ?
C10 C11 C12 119.3(4) . . ?
C13 C12 C11 120.6(4) . . ?
C13 C12 H12 119(2) . . ?
C11 C12 H12 120(2) . . ?
C8 C13 C12 119.1(4) . . ?
C8 C13 H13 120(2) . . ?
C12 C13 H13 121(2) . . ?
C15 C14 C19 118.7(3) . . ?
C15 C14 P1 119.1(3) . . ?
C19 C14 P1 117.8(3) . . ?
C16 C15 C14 117.7(3) . . ?
C16 C15 C24 114.8(3) . . ?
C14 C15 C24 127.5(3) . . ?
C17 C16 C15 123.8(4) . . ?
C17 C16 H16 118(3) . . ?
C15 C16 H16 118(3) . . ?
C16 C17 C18 116.3(4) . . ?
C16 C17 C28 122.4(4) . . ?
C18 C17 C28 121.3(3) . . ?
C19 C18 C17 123.7(4) . . ?
C19 C18 H18 118(3) . . ?
C17 C18 H18 119(3) . . ?
C18 C19 C14 117.9(3) . . ?
C18 C19 C20 114.9(3) . . ?
C14 C19 C20 127.2(3) . . ?
C23 C20 C22 108.4(4) . . ?
C23 C20 C21 105.8(3) . . ?
C22 C20 C21 109.1(4) . . ?
C23 C20 C19 116.1(3) . . ?
C22 C20 C19 110.3(3) . . ?
C21 C20 C19 106.8(3) . . ?
C20 C21 H21A 113(2) . . ?
C20 C21 H21B 111(2) . . ?
H21A C21 H21B 111(4) . . ?
C20 C21 H21C 109(3) . . ?
H21A C21 H21C 104(4) . . ?
H21B C21 H21C 108(4) . . ?
C20 C22 H22A 111(3) . . ?
C20 C22 H22B 110(3) . . ?
H22A C22 H22B 109(4) . . ?
C20 C22 H22C 109(3) . . ?
H22A C22 H22C 109(4) . . ?
H22B C22 H22C 109(4) . . ?
C20 C23 H23A 108(3) . . ?
C20 C23 H23B 113(2) . . ?
H23A C23 H23B 103(3) . . ?
C20 C23 H23C 109(3) . . ?
H23A C23 H23C 105(4) . . ?
H23B C23 H23C 118(4) . . ?
C25 C24 C26 109.6(4) . . ?
C25 C24 C27 105.7(4) . . ?
C26 C24 C27 108.9(4) . . ?
C25 C24 C15 114.7(3) . . ?
C26 C24 C15 110.3(3) . . ?
C27 C24 C15 107.4(3) . . ?
C24 C25 H25A 107(3) . . ?
C24 C25 H25B 111(3) . . ?
H25A C25 H25B 107(4) . . ?
C24 C25 H25C 114(3) . . ?
H25A C25 H25C 106(4) . . ?
H25B C25 H25C 112(4) . . ?
C24 C26 H26A 112(3) . . ?
C24 C26 H26B 111(3) . . ?
H26A C26 H26B 109(4) . . ?
C24 C26 H26C 110(3) . . ?
H26A C26 H26C 107(4) . . ?
H26B C26 H26C 108(4) . . ?
C24 C27 H27A 114(3) . . ?
C24 C27 H27B 111(3) . . ?
H27A C27 H27B 107(4) . . ?
C24 C27 H27C 111(3) . . ?
H27A C27 H27C 107(4) . . ?
H27B C27 H27C 106(4) . . ?
C30 C28 C31 108.5(4) . . ?
C30 C28 C29 108.2(4) . . ?
C31 C28 C29 109.7(4) . . ?
C30 C28 C17 112.7(3) . . ?
C31 C28 C17 110.3(4) . . ?
C29 C28 C17 107.4(3) . . ?
C28 C29 H29A 114(2) . . ?
C28 C29 H29B 112(3) . . ?
H29A C29 H29B 106(4) . . ?
C28 C29 H29C 111(3) . . ?
H29A C29 H29C 107(3) . . ?
H29B C29 H29C 107(4) . . ?
C28 C30 H30A 114(2) . . ?
C28 C30 H30B 107(2) . . ?
H30A C30 H30B 105(3) . . ?
C28 C30 H30C 109(3) . . ?
H30A C30 H30C 110(4) . . ?
H30B C30 H30C 111(4) . . ?
C28 C31 H31A 111(3) . . ?
C28 C31 H31B 112(3) . . ?
H31A C31 H31B 112(4) . . ?
C28 C31 H31C 111(3) . . ?
H31A C31 H31C 107(4) . . ?
H31B C31 H31C 104(4) . . ?
Cl2 C50 Cl1 111.0(3) . . ?
Cl2 C50 H50A 115(3) . . ?
Cl1 C50 H50A 104(3) . . ?
Cl2 C50 H50B 107(3) . . ?
Cl1 C50 H50B 110(3) . . ?
H50A C50 H50B 110(4) . . ?
 
